# Supplementary material for: Iron indenyl carbonyl compounds: CO-releasing molecules
Source: Royal Society of Chemistry journal article supplement (doi:10.1039/c0dt00203h), 2010-01-01
Supplement: c0dt00203h.pdf [file c0dt00203h.pdf]

## Iron indenyl carbonyl compounds: CO-releasing molecules

Lindsay Hewison,<sup>a</sup> Sian H. Crook,<sup>a</sup> Tony R. Johnson,<sup>a</sup> Brian E. Mann,<sup>\*a</sup> Harry Adams,<sup>a</sup> Sarah E. Plant,<sup>a</sup> Philip Sawle<sup>b</sup> and Roberto Motterlini<sup>c</sup>

**Table S1.** X-ray crystal data for  $[(\eta\text{-C}_9\text{H}_7)\text{Fe}(\text{CO})_2\text{L}][\text{BF}_4]$ , L = P(OPh)<sub>3</sub>, PPh<sub>3</sub>, MeC<sub>3</sub>N<sub>2</sub>H<sub>3</sub>, NCMe, CO and NC<sub>3</sub>H<sub>5</sub>.

|                                   |                                                                                                  |                                                                                                  |                                                                                                               |
|-----------------------------------|--------------------------------------------------------------------------------------------------|--------------------------------------------------------------------------------------------------|---------------------------------------------------------------------------------------------------------------|
| Compound                          | $[(\eta\text{-C}_9\text{H}_7)\text{Fe}(\text{CO})_2\text{P}(\text{OPh})_3][\text{BF}_4]$         | $[(\eta\text{-C}_9\text{H}_7)\text{Fe}(\text{CO})_2\text{PPh}_3][\text{BF}_4]\cdot\text{CHCl}_3$ | $[(\eta\text{-C}_9\text{H}_7)\text{Fe}(\text{CO})_2\text{MeC}_3\text{N}_2\text{H}_3][\text{BF}_4]$            |
| Empirical formula                 | C <sub>29</sub> H <sub>22</sub> B F <sub>4</sub> Fe O <sub>5</sub> P                             | C <sub>30</sub> H <sub>23</sub> B Cl <sub>3</sub> F <sub>4</sub> Fe O <sub>2</sub> P             | C <sub>15</sub> H <sub>13</sub> B F <sub>4</sub> Fe N <sub>2</sub> O <sub>2</sub>                             |
| Formula weight                    | 624.10                                                                                           | 695.46                                                                                           | 395.93                                                                                                        |
| Temperature                       | 150(2) K                                                                                         | 150(2) K                                                                                         | 100(2) K                                                                                                      |
| Wavelength                        | 0.71073 Å                                                                                        | 0.71073 Å                                                                                        | 0.71073 Å                                                                                                     |
| Crystal system                    | Monoclinic                                                                                       | Orthorhombic                                                                                     | Triclinic                                                                                                     |
| Space group                       | C c                                                                                              | P2 <sub>1</sub> 2 <sub>1</sub> 2 <sub>1</sub>                                                    | P-1                                                                                                           |
| Unit cell dimensions              | a = 13.092(12) Å<br>b = 20.322(12) Å<br>c = 21.77(2) Å<br>α = 90°<br>β = 107.458(17)°<br>γ = 90° | a = 9.4217(5) Å<br>b = 11.0573(5) Å<br>c = 28.4413(13) Å<br>α = 90°<br>β = 90°<br>γ = 90°        | a = 7.0213(5) Å<br>b = 10.6698(8) Å<br>c = 11.1259(8) Å<br>α = 78.540(3)°<br>β = 83.572(3)°<br>γ = 81.108(3)° |
| Volume                            | 5525(8) Å <sup>3</sup>                                                                           | 2963.0(2) Å <sup>3</sup>                                                                         | 804.23(10) Å <sup>3</sup>                                                                                     |
| Z                                 | 8                                                                                                | 4                                                                                                | 2                                                                                                             |
| Density (calculated)              | 1.501 Mg/m <sup>3</sup>                                                                          | 1.559 Mg/m <sup>3</sup>                                                                          | 1.635 Mg/m <sup>3</sup>                                                                                       |
| Absorption coefficient            | 0.669 mm <sup>-1</sup>                                                                           | 0.887 mm <sup>-1</sup>                                                                           | 0.992 mm <sup>-1</sup>                                                                                        |
| F(000)                            | 2544                                                                                             | 1408                                                                                             | 400                                                                                                           |
| Crystal size                      | 0.32 x 0.12 x 0.12 mm <sup>3</sup>                                                               | 0.22 x 0.17 x 0.17 mm <sup>3</sup>                                                               | 0.30 x 0.10 x 0.04 mm <sup>3</sup>                                                                            |
| Theta range for data collection   | 1.91 to 27.67°                                                                                   | 1.98 to 27.48°                                                                                   | 1.87 to 36.17°                                                                                                |
| Index ranges                      | -17 ≤ h ≤ 16,<br>-26 ≤ k ≤ 26,<br>-27 ≤ l ≤ 28                                                   | -12 ≤ h ≤ 12,<br>-13 ≤ k ≤ 14,<br>-36 ≤ l ≤ 36                                                   | -11 ≤ h ≤ 11,<br>-17 ≤ k ≤ 17,<br>-18 ≤ l ≤ 18                                                                |
| Reflections collected             | 31374                                                                                            | 58444                                                                                            | 21878                                                                                                         |
| Independent reflections           | 12567 [R(int) = 0.0967]                                                                          | 6787 [R(int) = 0.0387]                                                                           | 7270 [R(int) = 0.0269]                                                                                        |
| Completeness to                   | theta = 27.67°, 98.8%                                                                            | theta = 27.48°, 99.9%                                                                            | theta = 25.00°, 99.9%                                                                                         |
| Absorption correction             | Semi-empirical from equivalents                                                                  | Semi-empirical from equivalents                                                                  | Semi-empirical from equivalents                                                                               |
| Max. and min. transmission        | 0.9240 and 0.8143                                                                                | 0.8638 and 0.8288                                                                                | 0.9614 and 0.7552                                                                                             |
| Refinement method                 | Full-matrix least-squares on F <sup>2</sup>                                                      | Full-matrix least-squares on F <sup>2</sup>                                                      | Full-matrix least-squares on F <sup>2</sup>                                                                   |
| Data / restraints / parameters    | 12567 / 2 / 740                                                                                  | 6787 / 0 / 379                                                                                   | 7270 / 0 / 227                                                                                                |
| Goodness-of-fit on F <sup>2</sup> | 1.029                                                                                            | 1.029                                                                                            | 1.048                                                                                                         |
| Final R indices [I > 2σ(I)]       | R1 = 0.0683, wR2 = 0.1600                                                                        | R1 = 0.0253, wR2 = 0.0611                                                                        | R1 = 0.0446, wR2 = 0.1102                                                                                     |
| R indices (all data)              | R1 = 0.1050, wR2 = 0.1794                                                                        | R1 = 0.0274, wR2 = 0.0621                                                                        | R1 = 0.0561, wR2 = 0.1172                                                                                     |
| Absolute structure parameter      | 0.512(19)                                                                                        | 0.004(9)                                                                                         |                                                                                                               |
| Largest diff. peak and hole       | 1.681 and -0.455 e.Å <sup>-3</sup>                                                               | 0.633 and -0.409 e.Å <sup>-3</sup>                                                               | 1.266 and -0.974 e.Å <sup>-3</sup>                                                                            |
| Weighting scheme                  | 1/[σ <sup>2</sup> (F <sub>o</sub> <sup>2</sup> ) + (0.1040*P) <sup>2</sup> + 0.000*P]            | 1/[σ <sup>2</sup> (F <sub>o</sub> <sup>2</sup> ) + (0.7977*P) <sup>2</sup> + 0.0351*P]           | 1/[σ <sup>2</sup> (F <sub>o</sub> <sup>2</sup> ) + (0.0562*P) <sup>2</sup> + 0.5342*P]                        |
| CCDC Reference Number             | 766624                                                                                           | 766623                                                                                           | 766625                                                                                                        |

<sup>a</sup> P = (F<sub>o</sub><sup>2</sup> + 2 \* F<sub>c</sub><sup>2</sup>) / 3

Table S1 Continued.

|                                   |                                                                                                                                  |                                                                                                                             |                                                                                                                                               |
|-----------------------------------|----------------------------------------------------------------------------------------------------------------------------------|-----------------------------------------------------------------------------------------------------------------------------|-----------------------------------------------------------------------------------------------------------------------------------------------|
| Compound                          | $[(\eta\text{-C}_9\text{H}_7)\text{Fe}(\text{CO})_2(\text{NCMe})][\text{BF}_4]$                                                  | $[(\eta\text{-C}_9\text{H}_7)\text{Fe}(\text{CO})_3][\text{BF}_4]$                                                          | $[(\eta\text{-C}_9\text{H}_7)\text{Fe}(\text{CO})_2(\text{NC}_5\text{H}_5)][\text{BF}_4]$                                                     |
| Empirical formula                 | C13 H10 B F4 Fe N O2                                                                                                             | C12 H7 B F4 Fe O3                                                                                                           | C16 H12 B F4 Fe N O2                                                                                                                          |
| Formula weight                    | 354.88                                                                                                                           | 341.84                                                                                                                      | 392.93                                                                                                                                        |
| Temperature                       | 100(2) K                                                                                                                         | 150(2) K                                                                                                                    | 150(2) K                                                                                                                                      |
| Wavelength                        | 0.71073 Å                                                                                                                        | 0.71073 Å                                                                                                                   | 0.71073 Å                                                                                                                                     |
| Crystal system                    | Monoclinic                                                                                                                       | Orthorhombic                                                                                                                | Triclinic                                                                                                                                     |
| Space group                       | P2 <sub>1</sub> /c                                                                                                               | P2 <sub>1</sub> 2 <sub>1</sub> 2 <sub>1</sub>                                                                               | P-1                                                                                                                                           |
| Unit cell dimensions              | a = 9.6851(8) Å<br>b = 18.7238(16)<br>c = 7.7446(7) Å<br>$\alpha = 90^\circ$<br>$\beta = 95.239(4)^\circ$<br>$\gamma = 90^\circ$ | a = 8.4741(3) Å<br>b = 10.5865(4) Å<br>c = 14.1233(6) Å<br>$\alpha = 90^\circ$<br>$\beta = 90^\circ$<br>$\gamma = 90^\circ$ | a = 7.9950(16) Å<br>b = 9.5420(19) Å<br>c = 10.832(2) Å<br>$\alpha = 89.32(3)^\circ$<br>$\beta = 78.41(3)^\circ$<br>$\gamma = 82.82(3)^\circ$ |
| Volume                            | 1398.6(2) Å <sup>3</sup>                                                                                                         | 1267.02(8) Å <sup>3</sup>                                                                                                   | 803.1(3) Å <sup>3</sup>                                                                                                                       |
| Z                                 | 4                                                                                                                                | 4                                                                                                                           | 2                                                                                                                                             |
| Density (calculated)              | 1.685 Mg/m <sup>3</sup>                                                                                                          | 1.792 Mg/m <sup>3</sup>                                                                                                     | 1.625 Mg/m <sup>3</sup>                                                                                                                       |
| Absorption coefficient            | 1.128 mm <sup>-1</sup>                                                                                                           | 1.245 mm <sup>-1</sup>                                                                                                      | 0.991 mm <sup>-1</sup>                                                                                                                        |
| F(000)                            | 712                                                                                                                              | 680                                                                                                                         | 396                                                                                                                                           |
| Crystal size                      | 0.43 x 0.20 x 0.20 mm <sup>3</sup>                                                                                               | 0.38 x 0.21 x 0.21 mm <sup>3</sup>                                                                                          | 0.25 x 0.12 x 0.12 mm <sup>3</sup>                                                                                                            |
| Theta range for data collection   | 2.11 to 36.42°                                                                                                                   | 2.40 to 27.50°                                                                                                              | 1.92 to 27.53°                                                                                                                                |
| Index ranges                      | -16 ≤ h ≤ 15,<br>-26 ≤ k ≤ 30,<br>-12 ≤ l ≤ 12                                                                                   | -10 ≤ h ≤ 11,<br>-12 ≤ k ≤ 13,<br>-18 ≤ l ≤ 18                                                                              | -10 ≤ h ≤ 10,<br>-12 ≤ k ≤ 12,<br>-14 ≤ l ≤ 14                                                                                                |
| Reflections collected             | 47413                                                                                                                            | 9153                                                                                                                        | 18344                                                                                                                                         |
| Independent reflections           | 6726 [R(int) = 0.0270]                                                                                                           | 2867 [R(int) = 0.0310]                                                                                                      | 3675 [R(int) = 0.0320]                                                                                                                        |
| Completeness to                   | theta = 36.42°, 98.7%                                                                                                            | theta = 25.00°, 99.7%                                                                                                       | theta = 27.53°, 99.1%                                                                                                                         |
| Absorption correction             | Semi-empirical from equivalents                                                                                                  | Semi-empirical from equivalents                                                                                             | Semi-empirical from equivalents                                                                                                               |
| Max. and min. transmission        | 0.8059 and 0.6427                                                                                                                | 0.7801 and 0.6491                                                                                                           | 0.8903 and 0.7898                                                                                                                             |
| Refinement method                 | Full-matrix least-squares on F <sup>2</sup>                                                                                      | Full-matrix least-squares on F <sup>2</sup>                                                                                 | Full-matrix least-squares on F <sup>2</sup>                                                                                                   |
| Data / restraints / parameters    | 6726 / 7 / 210                                                                                                                   | 2867 / 3 / 190                                                                                                              | 3675 / 0 / 226                                                                                                                                |
| Goodness-of-fit on F <sup>2</sup> | 1.166                                                                                                                            | 1.427                                                                                                                       | 1.095                                                                                                                                         |
| Final R indices [I > 2σ(I)]       | R1 = 0.0372, wR2 = 0.0871                                                                                                        | R1 = 0.0228, wR2 = 0.0557                                                                                                   | R1 = 0.0310, wR2 = 0.0788                                                                                                                     |
| R indices (all data)              | R1 = 0.0436, wR2 = 0.0894                                                                                                        | R1 = 0.0238, wR2 = 0.0561                                                                                                   | R1 = 0.0377, wR2 = 0.0824                                                                                                                     |
| Absolute structure parameter      |                                                                                                                                  | 0.012(13)                                                                                                                   |                                                                                                                                               |
| Largest diff. peak and hole       | 0.795 and -0.496 e.Å <sup>-3</sup>                                                                                               | 0.274 and -0.340 e.Å <sup>-3</sup>                                                                                          | 0.882 and -0.539 e.Å <sup>-3</sup>                                                                                                            |
| Weighting Scheme <sup>a</sup>     | $1/[\sigma^2(\text{Fo}^2) + (0.0268 * \text{P})^2 + 0.9580 * \text{P}]$                                                          | $1/[\sigma^2(\text{Fo}^2) + (0.0000 * \text{P})^2 + 0.0000 * \text{P}]$                                                     | $1/[\sigma^2(\text{Fo}^2) + (0.0435 * \text{P})^2 + 0.2310 * \text{P}]$                                                                       |
| CCDC Reference Number             | 766622                                                                                                                           | 766621                                                                                                                      | 766626                                                                                                                                        |

<sup>a</sup>  $\text{P} = (\text{Fo}^2 + 2 * \text{Fc}^2) / 3$ .
